# Supplementary material
Source: Springer Nature journal article supplement (https://www.springermedizin.de/resource/supplementary/12885_2008_1191_MOESM4_ESM.pdf/9471360)

**A**

A G T T T G A G C G G T G G A T T T C G T T T C G G T T T T G ← -5-Aza-CdR

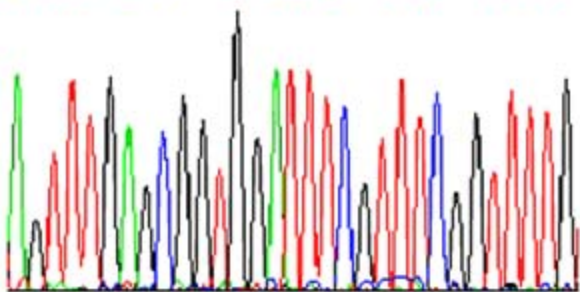

A G T T T G A G T G G T G G A T T T T G T T T T T G G G T T T T G ← +5-Aza-CdR

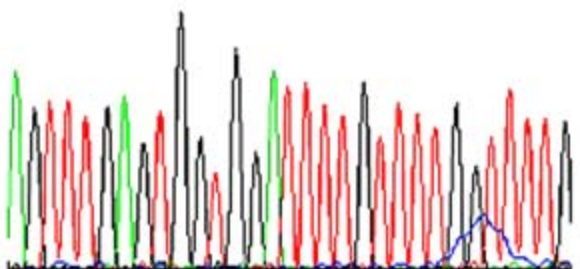**B**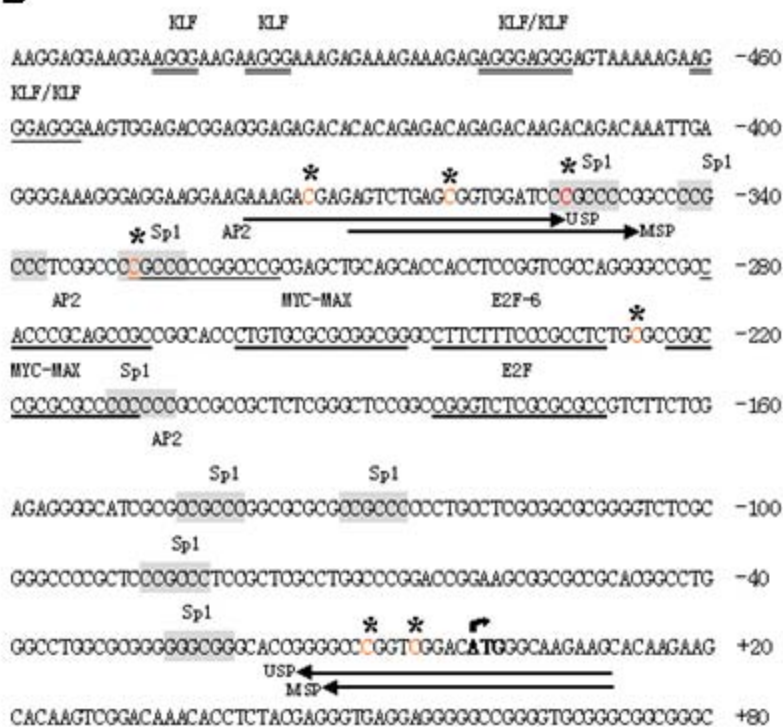

Supplement: MOESM4 [file 9471360]
